# Supplementary material for: Dual-drug loaded nanoparticles of Epigallocatechin-3-gallate (EGCG)/Ascorbic acid enhance therapeutic efficacy of EGCG in a APPswe/PS1dE9 Alzheimer's disease mice model
Source: PubMed Central journal article supplement (PMC6510952; doi:10.1016/j.jconrel.2019.03.010), 2019-05-10
Supplement: mmc1.pdf [file mmc1.pdf]

## Supplementary material

Dual-drug loaded nanoparticles of Epigallocatechin-3-gallate (EGCG) / Ascorbic acid enhance therapeutic efficacy of EGCG in a APPswe/PS1dE9 Alzheimer's disease mice model.

Cano *et al.*

### Figures

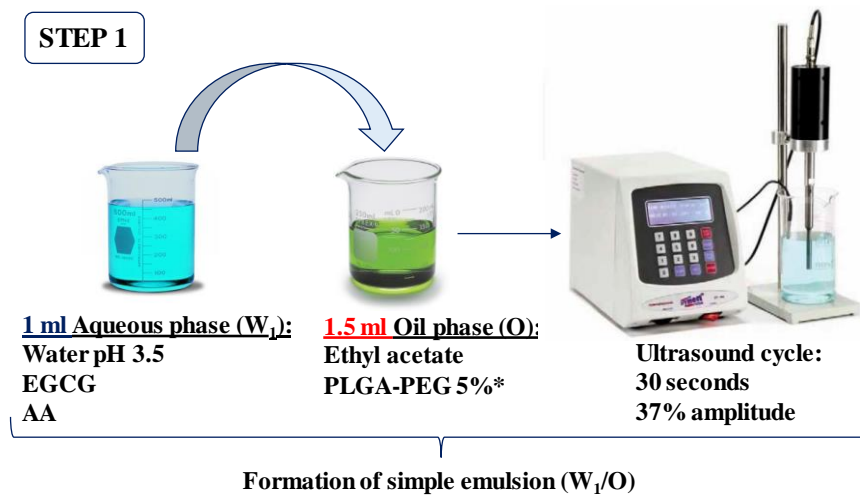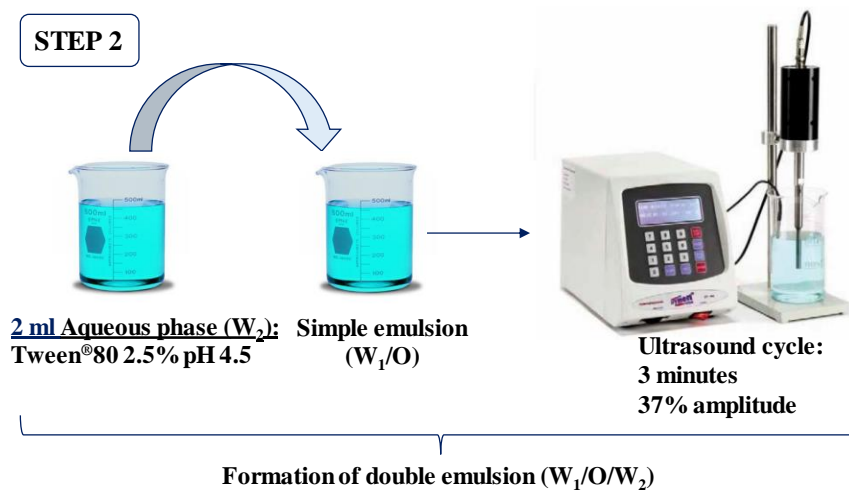

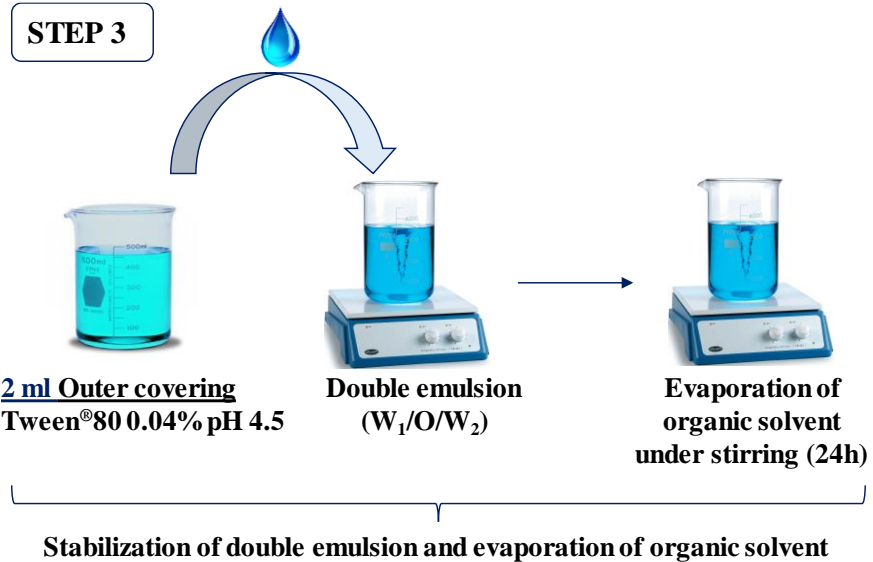

**Figure S1.** Fabrication of EGCG/AA NPs by double emulsion method. Final volume of 5 ml. \*Percentage of PEG that contains PLGA.

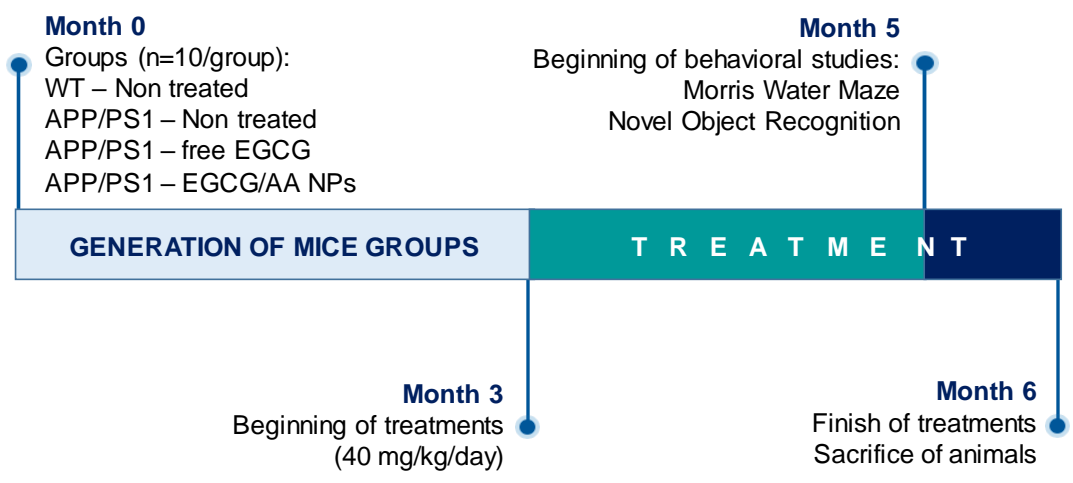

**Figure S2.** Timeline, groups distribution, dosage and behavioural tests of EGCG/AA NPs and free EGCG treatments. Dose of both treatments were recalculated and readjusted every week according to the weight gain of the animals.

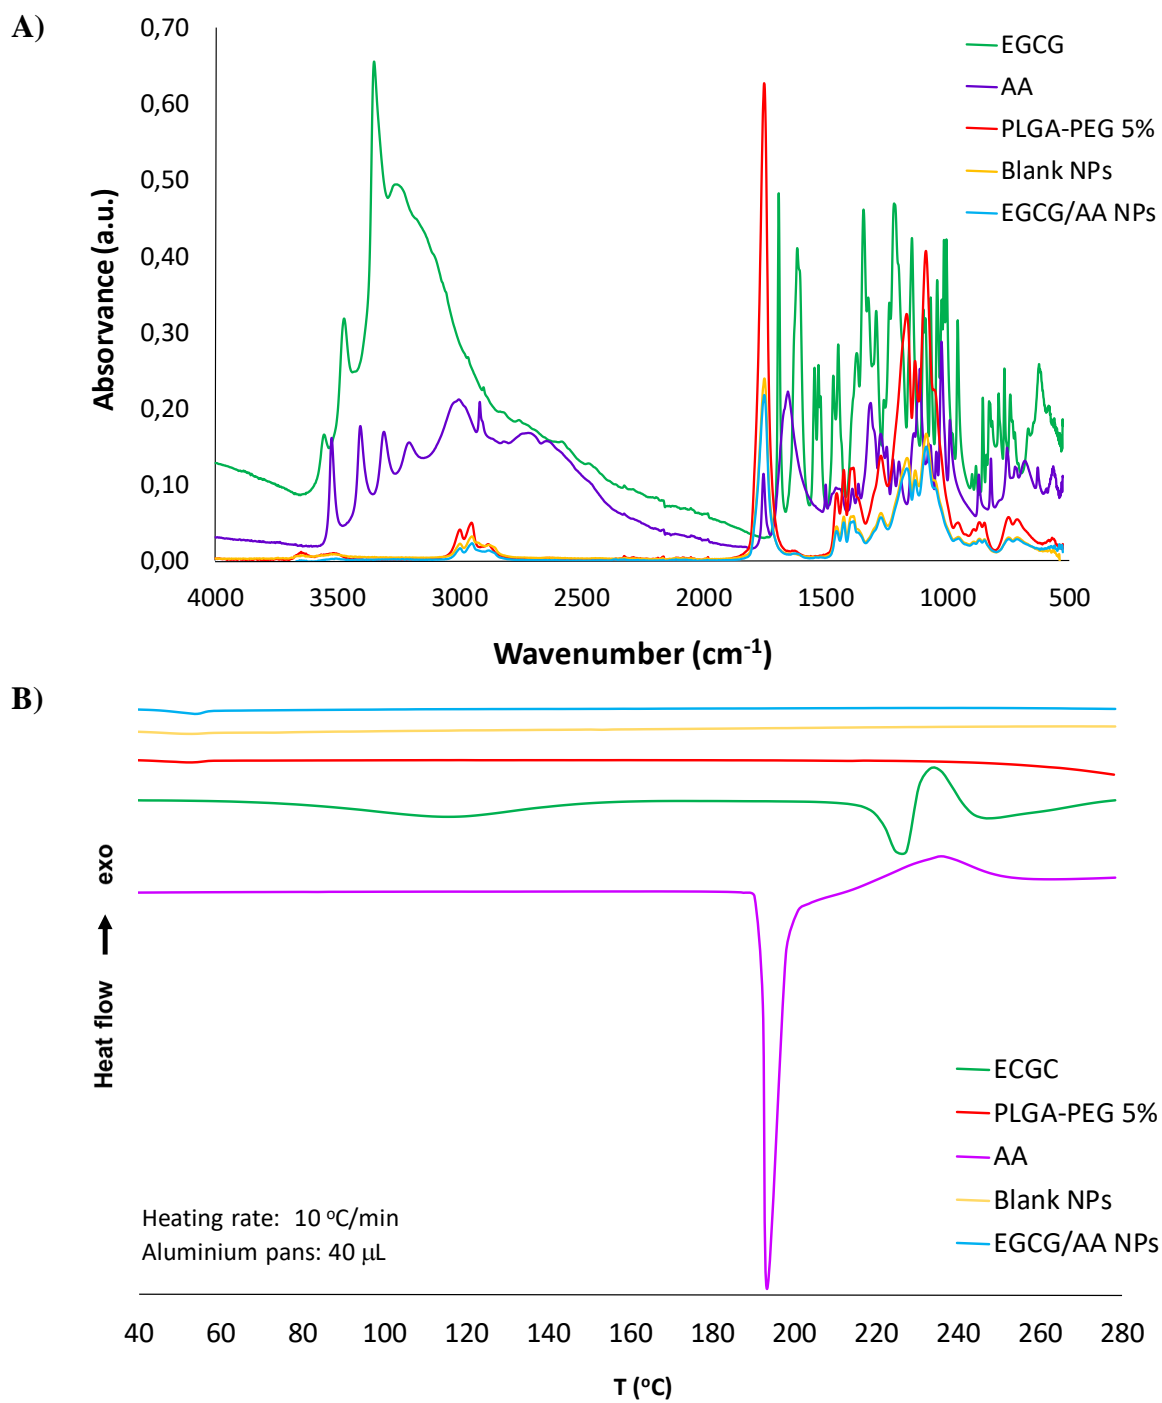

**Figure S3.** Interaction studies of EGCG/AA NPs compounds. **A)** FTIR spectra. **B)** DSC thermograms.

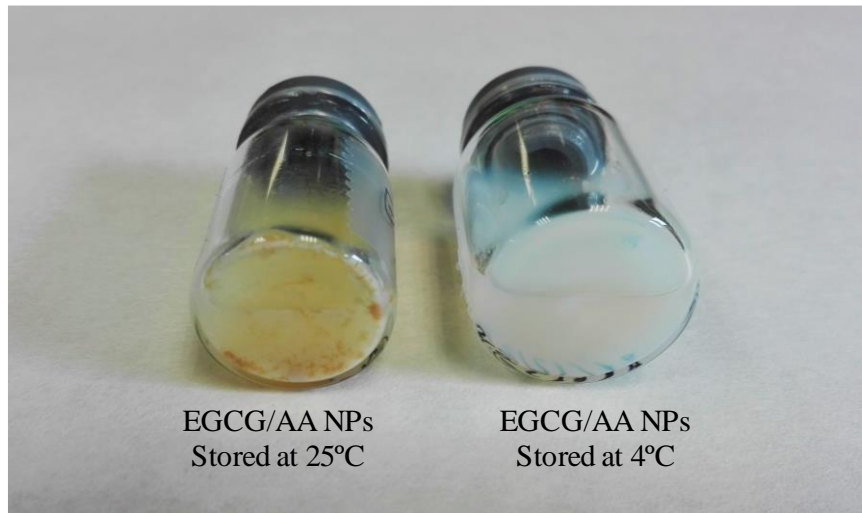

**Figure S4.** EGCG/AA NPs appearance at 4th month of storage.

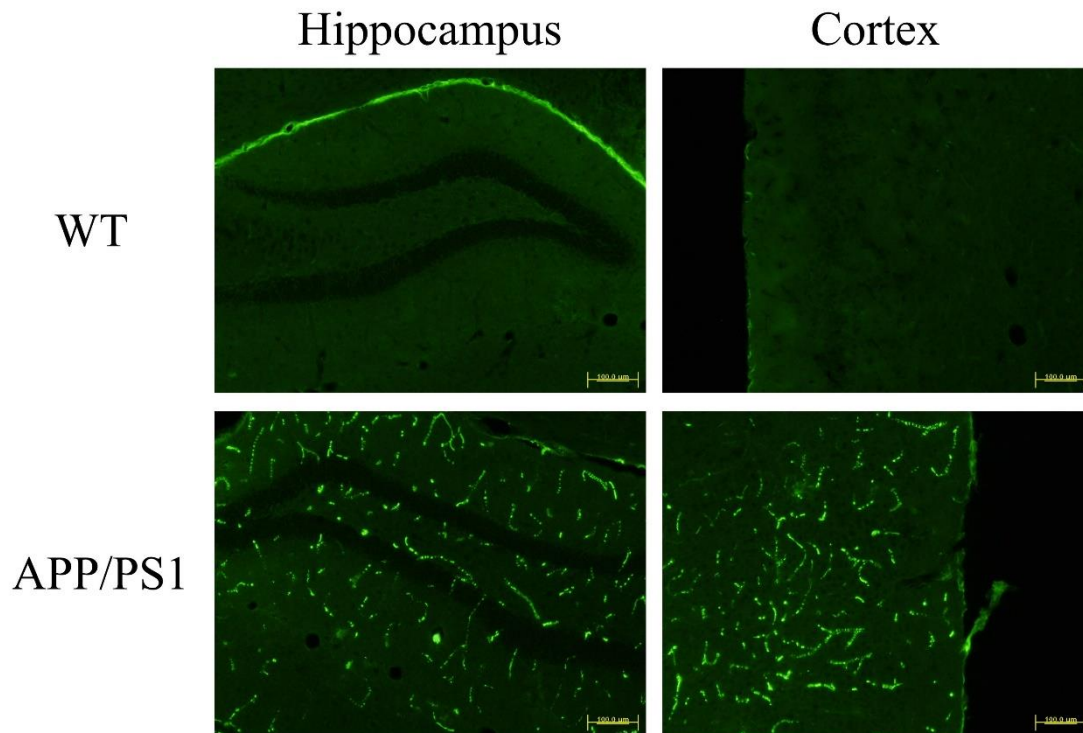

**Figure S5. Endogenous IgG leakage in mouse brains.** C57BL/6 WT and APP/PS1 mice were sacrificed by i.p. injection of ketamine/xylazine (100/10 mg/kg, respectively) and perfused with PFA 4%. Brain coronal sections of 20  $\mu\text{m}$  of thickness were stained with Goat Anti-Mouse IgG (H+L) antibody, AlexaFluor 488 Green (1:1000; Life Technologies, Cambridge, UK). Image acquisition was carried out with an epifluorescence microscope (BX41, Olympus, Germany).

## Tables

**Table S1.** Physicochemical characteristics of EGCG/AA NPs stored at different temperatures

| Month     | Stored temperature 25°C |               |             | Stored temperature 4°C |               |             |
|-----------|-------------------------|---------------|-------------|------------------------|---------------|-------------|
|           | Size (nm)               | PDI           | ZP (mV)     | Size (nm)              | PDI           | ZP (mV)     |
| <b>0</b>  | 120.3 ± 0.7             | 0.063 ± 0.012 | -12.0 ± 2.1 | 118.6 ± 1.5            | 0.072 ± 0.004 | -13.5 ± 1.3 |
| <b>1</b>  | 123.2 ± 1.5             | 0.059 ± 0.020 | -10.0 ± 0.8 | 119.2 ± 0.9            | 0.082 ± 0.018 | -12.3 ± 0.7 |
| <b>2</b>  | 120.9 ± 1.2             | 0.043 ± 0.008 | -12.2 ± 2.8 | 117.9 ± 0.6            | 0.062 ± 0.017 | -13.1 ± 0.5 |
| <b>3</b>  | 130.5 ± 0.4             | 0.167 ± 0.018 | -12.6 ± 0.8 | 119.2 ± 1.8            | 0.093 ± 0.015 | -12.1 ± 1.1 |
| <b>4</b>  | 941.2 ± 9.4             | 0.700 ± 0.282 | -           | 124.9 ± 0.5            | 0.107 ± 0.011 | -12.6 ± 0.2 |
| <b>5</b>  | -                       | -             | -           | 128.5 ± 2.2            | 0.095 ± 0.019 | -11.5 ± 1.2 |
| <b>7</b>  | -                       | -             | -           | 125.4 ± 2.3            | 0.121 ± 0.024 | -10.3 ± 1.3 |
| <b>9</b>  | -                       | -             | -           | 126.2 ± 0.5            | 0.150 ± 0.030 | -10.4 ± 1.5 |
| <b>11</b> | -                       | -             | -           | 90.6 ± 2.5             | 0.250 ± 0.204 | -8.6 ± 0.7  |

**Table S2.** ANOVA analysis results of the A $\beta$  plaques depositions and A $\beta$  (1-42) peptide levels

| Test                            | Condition                          | Tukey's multiple comparisons test         | Mean Diff. | 95% CI of diff.  | Significant? | Summary | Adjusted P Value |
|---------------------------------|------------------------------------|-------------------------------------------|------------|------------------|--------------|---------|------------------|
| A $\beta$ plaques               | Hippocampal region                 | APP/PS1 vs. APP/PS1 free EGCG             | 3.528      | 0.6070 to 6.449  | Yes          | *       | 0.0155           |
|                                 |                                    | APP/PS1 vs. APP/PS1 EGCG/AA NPs           | 7.639      | 4.718 to 10.56   | Yes          | ****    | < 0.0001         |
|                                 |                                    | APP/PS1 free EGCG vs. APP/PS1 EGCG/AA NPs | 4.111      | 0.9887 to 7.234  | Yes          | **      | 0.0081           |
|                                 | Cortical region                    | APP/PS1 vs. APP/PS1 free EGCG             | 7.447      | 4.771 to 10.12   | Yes          | ****    | < 0.0001         |
|                                 |                                    | APP/PS1 vs. APP/PS1 EGCG/AA NPs           | 9.114      | 6.438 to 11.79   | Yes          | ****    | < 0.0001         |
|                                 |                                    | APP/PS1 free EGCG vs. APP/PS1 EGCG/AA NPs | 1.667      | -0.9501 to 4.283 | No           | ns      | 0.2751           |
| A $\beta$ (1-42) peptide levels | Soluble A $\beta$ (1-42) peptide   | APP/PS1 vs. APP/PS1 free EGCG             | -1.799     | -16.08 to 12.48  | No           | ns      | 0.9219           |
|                                 |                                    | APP/PS1 vs. APP/PS1 EGCG/AA NPs           | 20.45      | 6.177 to 34.73   | Yes          | *       | 0.0109           |
|                                 |                                    | APP/PS1 free EGCG vs. APP/PS1 EGCG/AA NPs | 22.25      | 7.976 to 36.53   | Yes          | **      | 0.0073           |
|                                 | Insoluble A $\beta$ (1-42) peptide | APP/PS1 vs. APP/PS1 free EGCG             | 25.40      | -14.96 to 65.76  | No           | ns      | 0.2105           |
|                                 |                                    | APP/PS1 vs. APP/PS1 EGCG/AA NPs           | 94.53      | 54.17 to 134.9   | Yes          | ***     | 0.0009           |
|                                 |                                    | APP/PS1 free EGCG vs. APP/PS1 EGCG/AA NPs | 69.13      | 28.77 to 109.5   | Yes          | **      | 0.0046           |

**Table S3.** ANOVA analysis results of the behavioural test

| Test | Condition                                 | Tukey's multiple comparisons test         | Mean Diff.     | 95% CI of diff.  | Significant?     | Summary | Adjusted P Value |
|------|-------------------------------------------|-------------------------------------------|----------------|------------------|------------------|---------|------------------|
| MWM  | Escape latency - Learning process         | WT vs. APP/PS1                            | -33.48         | -46.76 to -20.19 | Yes              | ****    | < 0.0001         |
|      |                                           | WT vs. APP/PS1 free EGCG                  | -18.59         | -32.27 to -4.902 | Yes              | **      | 0.0054           |
|      |                                           | WT vs. APP/PS1 EGCG/AA NPs                | -9.915         | -24.81 to 4.981  | No               | ns      | 0.2786           |
|      |                                           | APP/PS1 vs. APP/PS1 free EGCG             | 14.89          | 2.159 to 27.62   | Yes              | *       | 0.018            |
|      |                                           | APP/PS1 vs. APP/PS1 EGCG/AA NPs           | 23.56          | 9.540 to 37.59   | Yes              | ***     | 0.0006           |
|      |                                           | APP/PS1 free EGCG vs. APP/PS1 EGCG/AA NPs | 8.673          | -5.731 to 23.08  | No               | ns      | 0.3615           |
|      |                                           | Escape latency - Test day                 | WT vs. APP/PS1 | -43.03           | -54.50 to -31.55 | Yes     | ****             |
|      | WT vs. APP/PS1 free EGCG                  |                                           | -15.61         | -27.78 to -3.442 | Yes              | *       | 0.0103           |
|      | WT vs. APP/PS1 EGCG/AA NPs                |                                           | -2.376         | -13.85 to 9.095  | No               | ns      | 0.9314           |
|      | APP/PS1 vs. APP/PS1 free EGCG             |                                           | 27.42          | 15.25 to 39.58   | Yes              | ****    | < 0.0001         |
|      | APP/PS1 vs. APP/PS1 EGCG/AA NPs           |                                           | 40.65          | 29.18 to 52.12   | Yes              | ****    | < 0.0001         |
|      | APP/PS1 free EGCG vs. APP/PS1 EGCG/AA NPs |                                           | 13.23          | 1.066 to 25.40   | Yes              | *       | 0.0309           |

|                                    |                                           |         |                  |     |      |          |
|------------------------------------|-------------------------------------------|---------|------------------|-----|------|----------|
| Time in target quadrant – Test day | WT vs. APP/PS1                            | 10.36   | 4.360 to 16.37   | Yes | ***  | 0.0003   |
|                                    | WT vs. APP/PS1 free EGCG                  | 3.748   | -1.939 to 9.435  | No  | ns   | 0.2947   |
|                                    | WT vs. APP/PS1 EGCG/AA NPs                | 3.000   | -2.573 to 8.572  | No  | ns   | 0.4685   |
|                                    | APP/PS1 vs. APP/PS1 free EGCG             | -6.615  | -12.05 to -1.177 | Yes | *    | 0.0126   |
|                                    | APP/PS1 vs. APP/PS1 EGCG/AA NPs           | -7.363  | -12.68 to -2.046 | Yes | **   | 0.0040   |
|                                    | APP/PS1 free EGCG vs. APP/PS1 EGCG/AA NPs | -0.7487 | -5.707 to 4.209  | No  | ns   | 0.9759   |
| Time in border – Test day          | WT vs. APP/PS1                            | -35.14  | -49.66 to -20.61 | Yes | **** | < 0.0001 |
|                                    | WT vs. APP/PS1 free EGCG                  | -7.718  | -22.25 to 6.811  | No  | ns   | 0.4634   |
|                                    | WT vs. APP/PS1 EGCG/AA NPs                | -6.417  | -20.95 to 8.113  | No  | ns   | 0.6121   |
|                                    | APP/PS1 vs. APP/PS1 free EGCG             | 27.42   | 12.89 to 41.95   | Yes | ***  | 0.0002   |
|                                    | APP/PS1 vs. APP/PS1 EGCG/AA NPs           | 28.72   | 14.19 to 43.25   | Yes | ***  | 0.0001   |
|                                    | APP/PS1 free EGCG vs. APP/PS1 EGCG/AA NPs | 1.302   | -13.23 to 15.83  | No  | ns   | 0.9943   |
| <b>NOR</b> Exploration time        | WT vs. APP/PS1                            | 28.23   | 18.03 to 38.43   | Yes | **** | < 0.0001 |
|                                    | WT vs. APP/PS1 free EGCG                  | 16.76   | 5.354 to 28.16   | Yes | **   | 0.0023   |
|                                    | WT vs. APP/PS1 EGCG/AA NPs                | 2.544   | -8.122 to 13.21  | No  | ns   | 0.9131   |
|                                    | APP/PS1 vs. APP/PS1 free EGCG             | -11.48  | -21.67 to -1.278 | Yes | *    | 0.0231   |
|                                    | APP/PS1 vs. APP/PS1 EGCG/AA NPs           | -25.69  | -35.06 to -16.32 | Yes | **** | < 0.0001 |
|                                    | APP/PS1 free EGCG vs. APP/PS1 EGCG/AA NPs | -14.21  | -24.88 to -3.547 | Yes | **   | 0.0059   |
